# Supplementary material
Source: MDPI journal article supplement (https://www.mdpi.com/2227-9040/11/2/128)
Supplement: s1 [file s1 › chemosensors-2158118-supplementary.pdf]

Supplementary Materials

# Analyzing the electrochemical interaction of the angiogenesis inhibitor batimastat by surface-enhanced Raman spectroscopy

Ewa Pięta,<sup>1</sup> Czesława Paluszkievicz,<sup>1</sup> W. M. Kwiatek,<sup>1</sup> Maria Rosa Lopez-Ramirez<sup>2\*</sup>

<sup>1</sup> Institute of Nuclear Physics Polish Academy of Sciences, PL-31342 Krakow, Poland

<sup>2</sup> Department of Physical Chemistry, Faculty of Science, University of Málaga, E-29071 Málaga, Spain

\* Correspondence: María Rosa López-Ramírez, mrlopez@uma.es

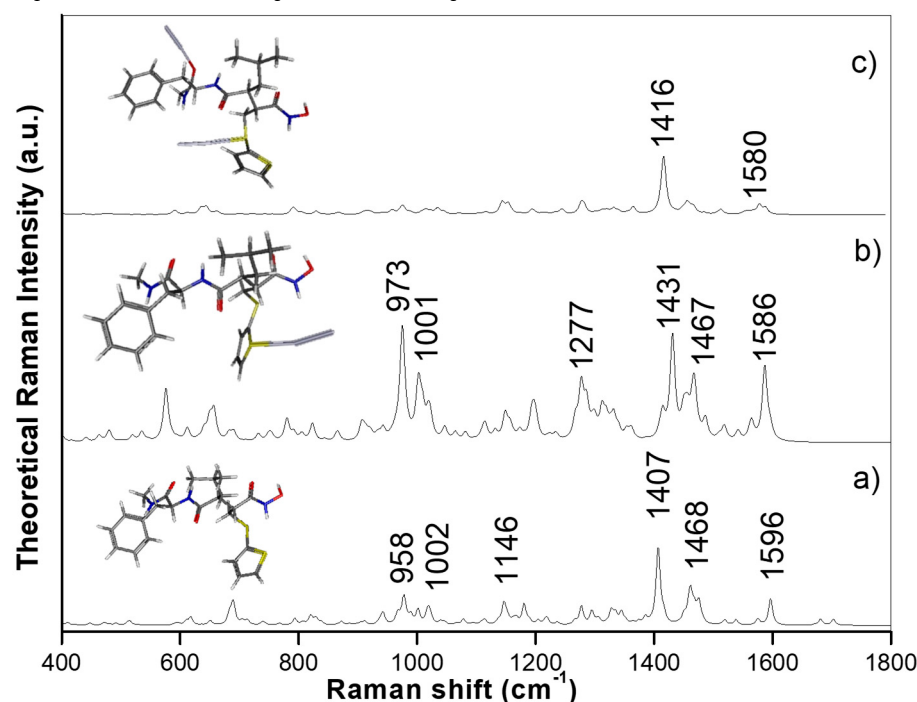

**Figure S1.** Theoretical Raman spectra (inset: molecular optimized structure of each species) calculated at B3LYP/6-31G(d,p) level of theory of: a) BB-94 and at B3LYP/LanL2DZ level of theory of b) BB-94-SAg and c) BB-94-SAg-OAg.

**Table S1.** Plot showing the optimized structures and HOMO and LUMO energy levels for BB-94 and corresponding metal complexes. The orbital energies are in atomic units (a. u.) and the GAP is in electron volts (eV).

| Name  | Optimized structure                                                                 | HOMO (a.u.)                                                                          | LUMO (a.u.)                                                                           | GAP (eV) |
|-------|-------------------------------------------------------------------------------------|--------------------------------------------------------------------------------------|---------------------------------------------------------------------------------------|----------|
| BB-94 | 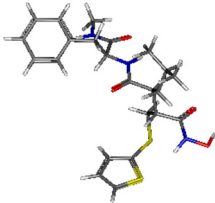 | 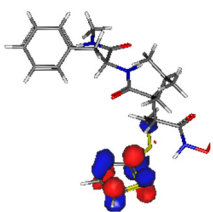 | 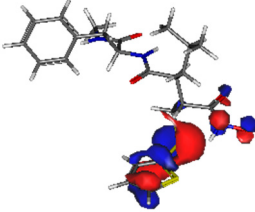 |          |
|       |                                                                                     | -0.23169                                                                             | -0.03563                                                                              | 5.34     |

|               |                                                                                   |                                                                                    |                                                                                     |
|---------------|-----------------------------------------------------------------------------------|------------------------------------------------------------------------------------|-------------------------------------------------------------------------------------|
| BB-94-SAg     | 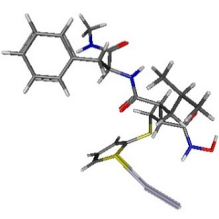 | 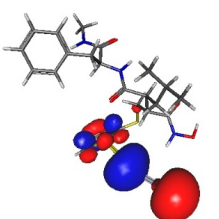 | 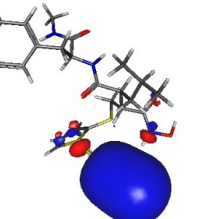 |
|               | -0.19489                                                                          | -0.07838                                                                           | 3.17                                                                                |
| BB-94-SAg-OAg | 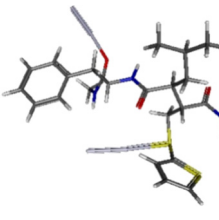 | 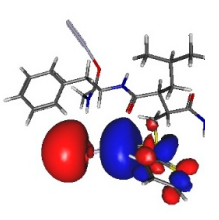 | 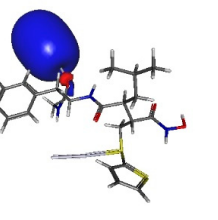 |
|               | -0.17118                                                                          | -0.08388                                                                           | 2.38                                                                                |

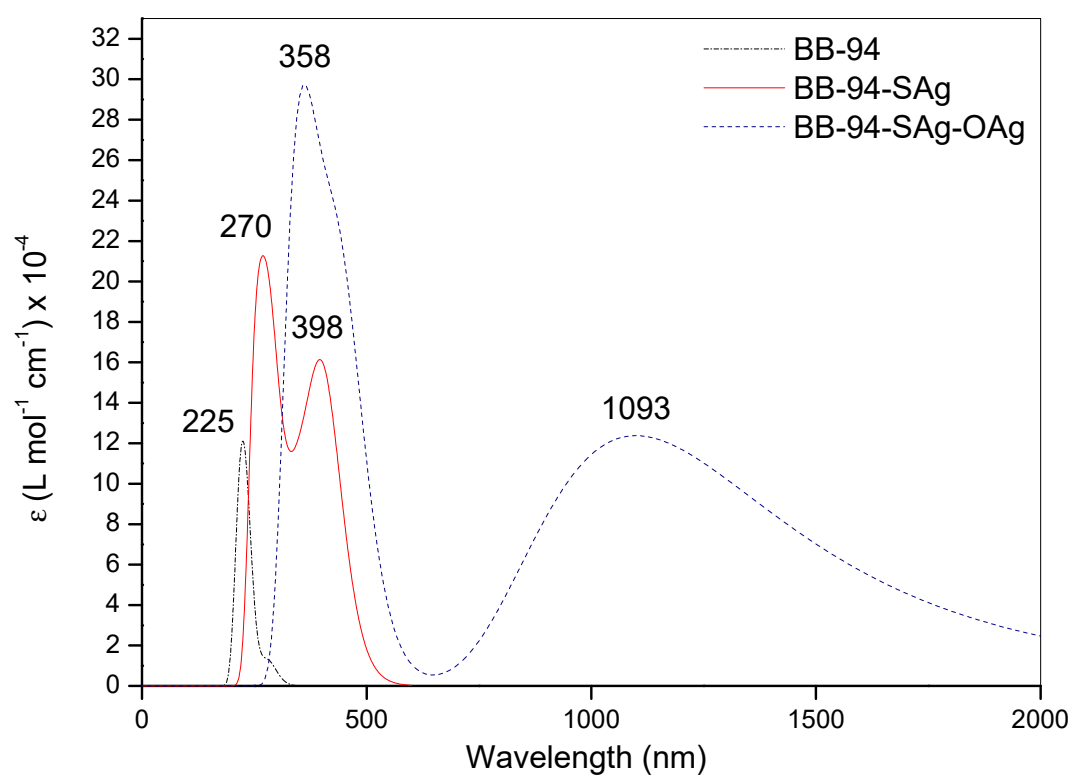

**Figure S2.** Computed UV-Vis absorptionspectra calculated by using DFT-TD at B3LYP/6-31G(d,p) level of theory for BB-94 and B3LYP/LanL2DZ level of theory for BB-94-SAg and BB-94-SAg-OAg.
